# Supplementary material for: Cobalt layered double hydroxide nanosheets synthesized in water–methanol solution as oxygen evolution electrocatalysts
Source: Royal Society of Chemistry journal article supplement (doi:10.1039/c7ta10351d), 2018-01-01
Supplement: c7ta10351d1.pdf [file c7ta10351d1.pdf]

## Supplementary Information

### Cobalt Layered Double Hydroxides Nanosheets Synthesized in Water-Methanol Solution as Oxygen Evolution Electrocatalysts

Xiao Xu,<sup>a</sup> Zhou Zhong,<sup>a,b</sup> Xiaomei Yan,<sup>a</sup> Longtian Kang,<sup>a,\*</sup> and Jiannian Yao,<sup>c,\*</sup>

<sup>a</sup> Key Laboratory of Design and Assembly of Functional Nanostructures, and Fujian Provincial Key Laboratory of Nanomaterials, Fujian Institute of Research on the Structure of Matter, Chinese Academy of Sciences, Fuzhou, Fujian 350002, P. R. China.

<sup>b</sup> University of Chinese Academy of Sciences, Chinese Academy of Sciences, Beijing, 100049, P. R. China.

<sup>c</sup> Beijing National Laboratory for Molecular Sciences (BNLMS), Institute of Chemistry, Chinese Academy of Sciences, Beijing 100190, P. R. China.

\*E-mail: longtiank@fjirsm.ac.cn; jnyao@iccas.ac.cn.

### Supplementary Electrochemical measurements

A rotating ring-disk electrode (RRDE, PINE Research Instrumentation, 6.5~8.5 mm, 5.5 mm) was used as the working electrode to test the H<sub>2</sub>O<sub>2</sub> yield. The catalyst loading is 0.084 mg cm<sup>-2</sup>. The ring potential was set at 0.6 V vs Ag/AgCl. The electron transfer number (n) is calculated from the disk current (J<sub>d</sub>), ring current (J<sub>r</sub>) and current collection efficiency (N=0.38) of the RRDE based on the following Equation.

$$n = \frac{4 \times J_d}{J_d + \frac{J_r}{N}}$$

CV curves were carried out from 0.22 to 0.3 V vs Ag/AgCl to obtain electrochemical double-layer capacitance (C<sub>dl</sub>) by plotting charging current density differences (J<sub>a</sub>-J<sub>c</sub>) at 0.25 V vs Ag/AgCl against scan rates.

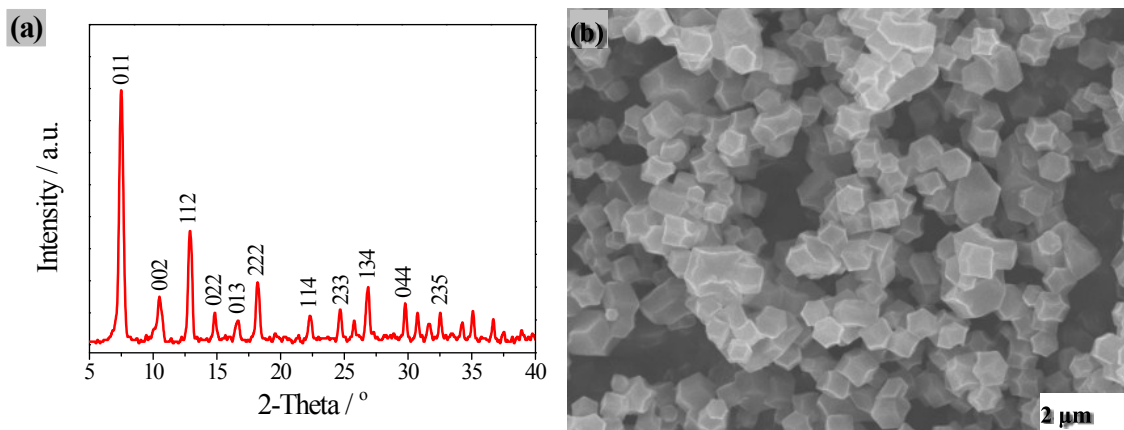

**Fig. S1.** (a) XRD pattern and (b) SEM image of ZIF-67 particles synthesized at 90 °C for 4 h in pure methanol.

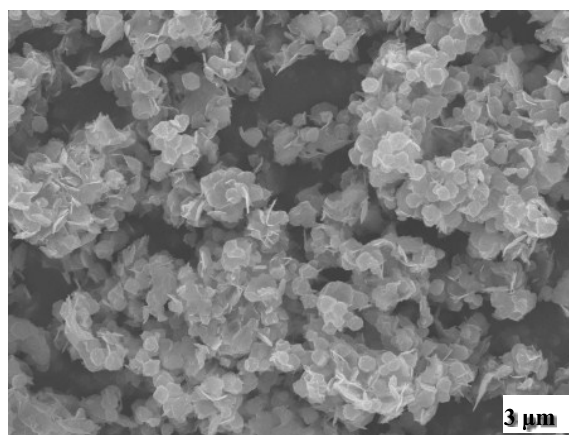

**Fig. S2.** SEM image of composites derived at 90 °C for 4 h in water-methanol solution containing 2 vol% of water.

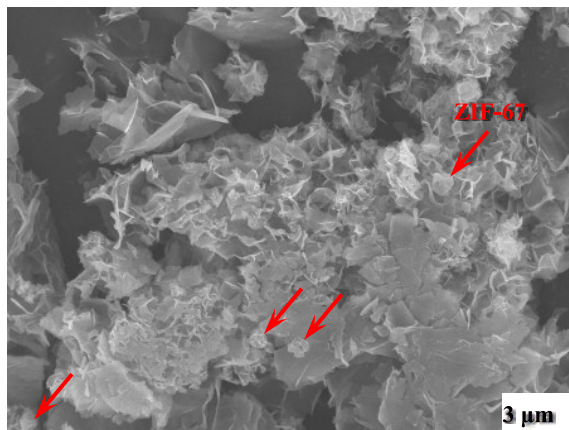

**Fig. S3.** SEM image of composites derived at 90 °C for 4 h in water-methanol solution containing 5 vol% of water.

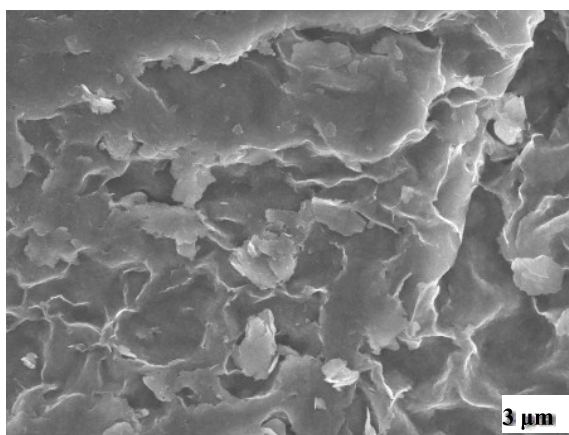

**Fig. S4.** SEM image of composites derived at 90 °C for 4 h in water-methanol solution containing 50 vol% of water.

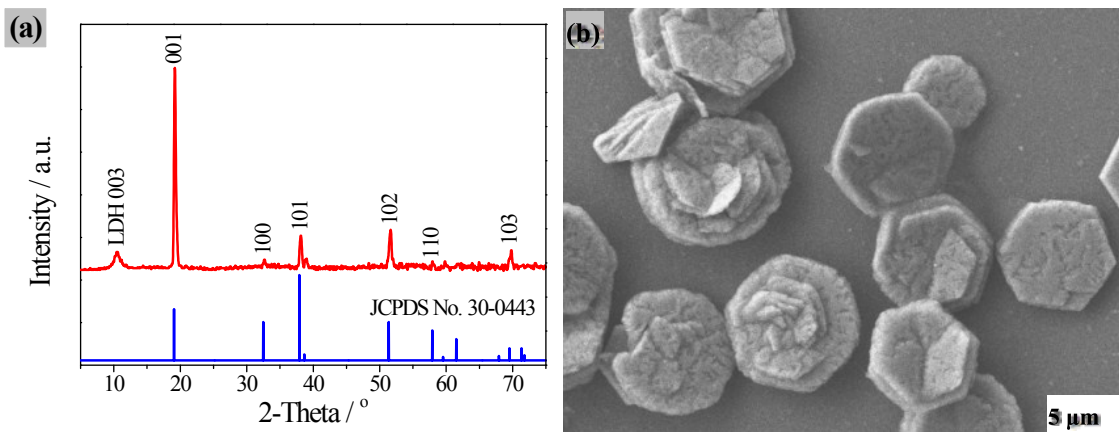

**Fig. S5.** (a) XRD pattern and (b) SEM image of Co(OH)<sub>2</sub> plates synthesized at 90 °C for 4 h in DI water.

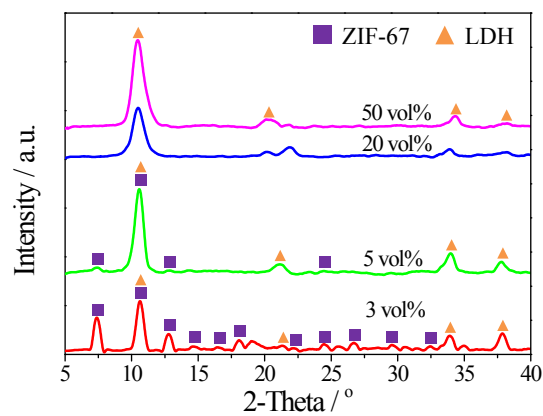

**Fig. S6.** XRD patterns of composites derived at 90 °C for 4 h in water-methanol solution containing different amounts of water.

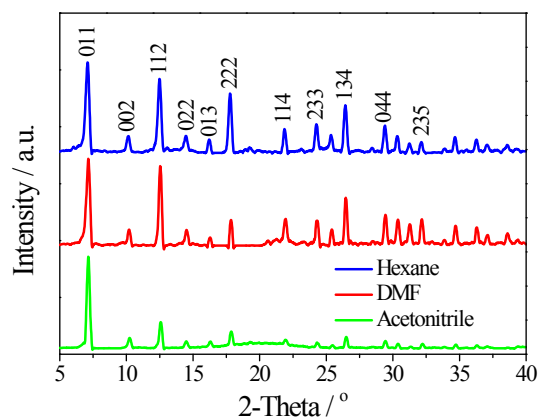

**Fig. S7.** XRD patterns of ZIF-67 particles synthesized at 90 °C for 4 h in methanol solution containing 10 vol% of different solvent: (a) hexane; (b) DMF and (c) acetonitrile.

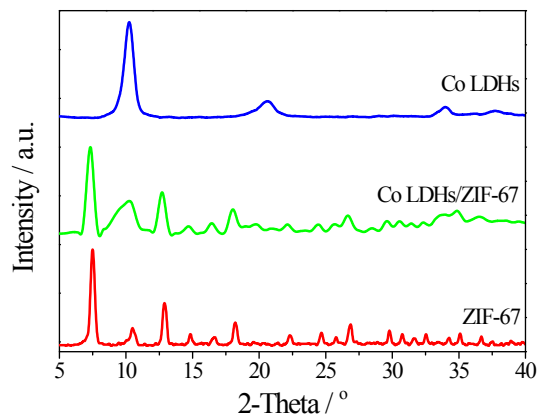

**Fig. S8.** XRD pattern of Co LDHs/ZIF-67 prepared by the hydrolysis reaction of pre-synthesized ZIF-67 (100 mg) at 90 °C for 4 h in water-methanol solution (70 mL) containing 10 vol% of water in the absence of cobalt (II) nitrate.

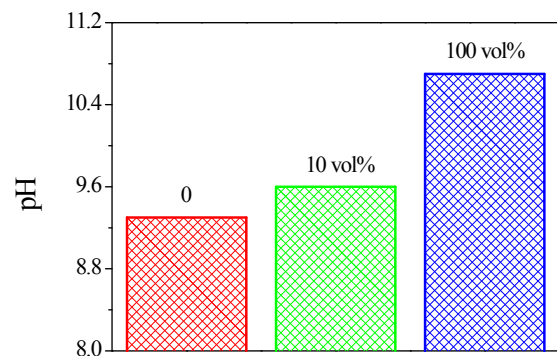

**Fig. S9.** pH value of 2MI (840 mg) in water-methanol solution (70 mL) containing different amounts of water.

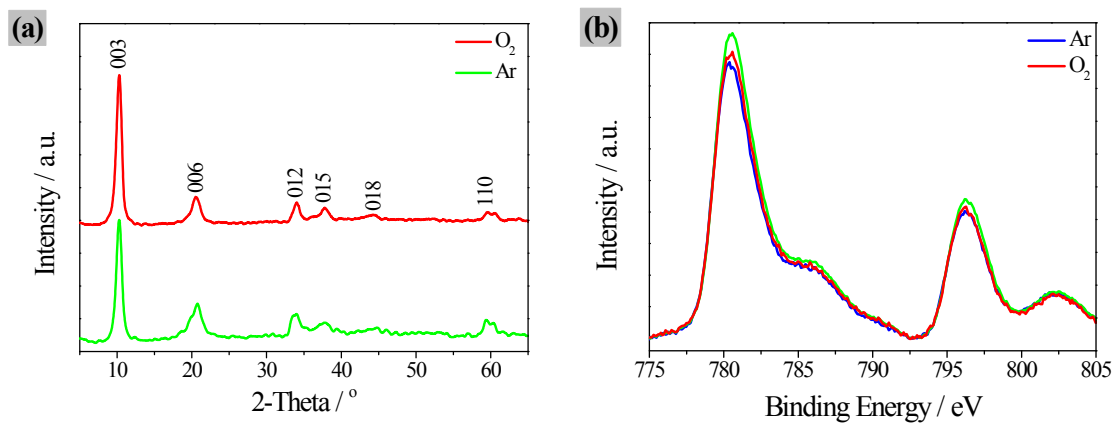

**Fig. S10.** (a) XRD patterns and (b) Co 2p high-resolution XPS spectra for Co LDHs synthesized at 90 °C for 4 h in Ar and O<sub>2</sub>-saturated water-methanol solution containing 10 vol% of water.

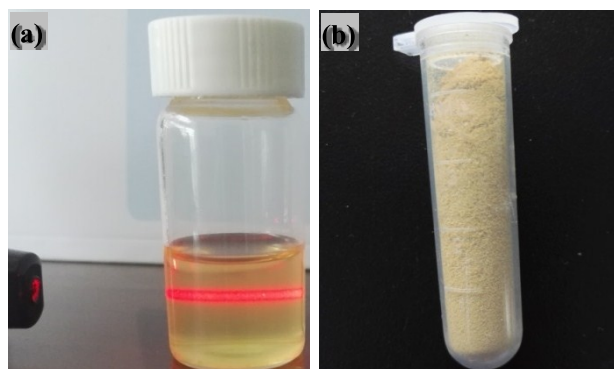

**Fig. S11.** Optical images of Co-LDHNS-II: (a) Tyndall effect of colloidal solutions and (b) about 100 mg of dried powders in 5 mL centrifuge tube.

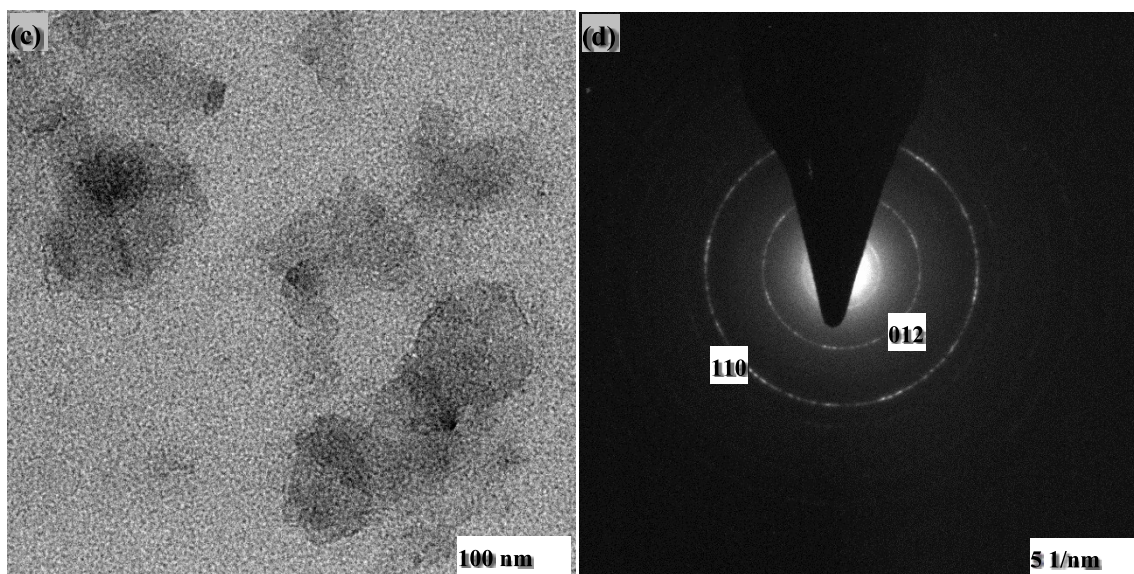

**Fig. S12.** (a) TEM image and (b) selected area diffraction pattern of Co-LDHNS-III.



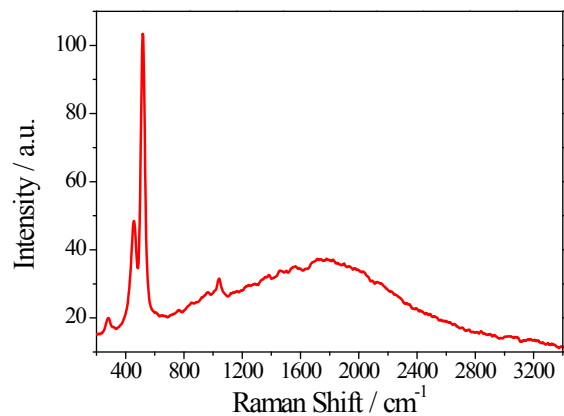

**Fig. S13.** Raman spectrum of Co-LDHNS-II.

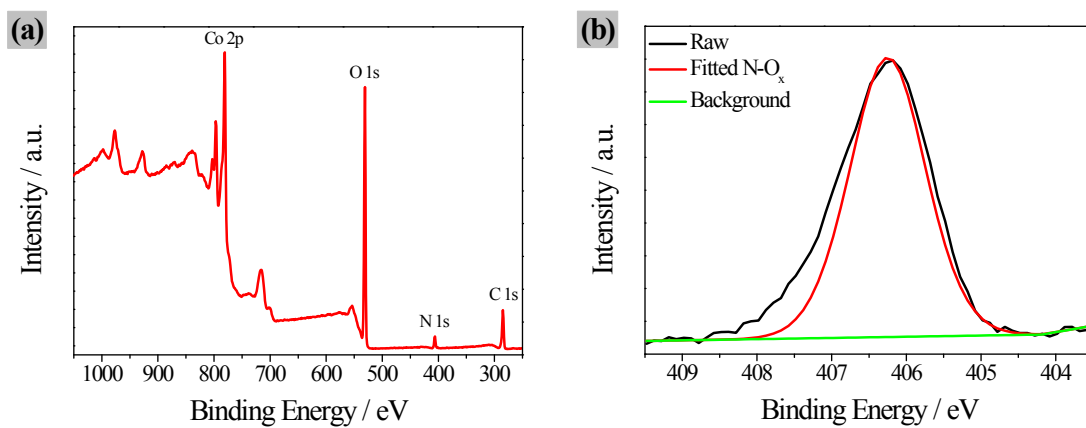

**Fig. S14.** (a) XPS survey spectrum and (b) N 1s high-resolution spectrum of Co-LDHNS-II.

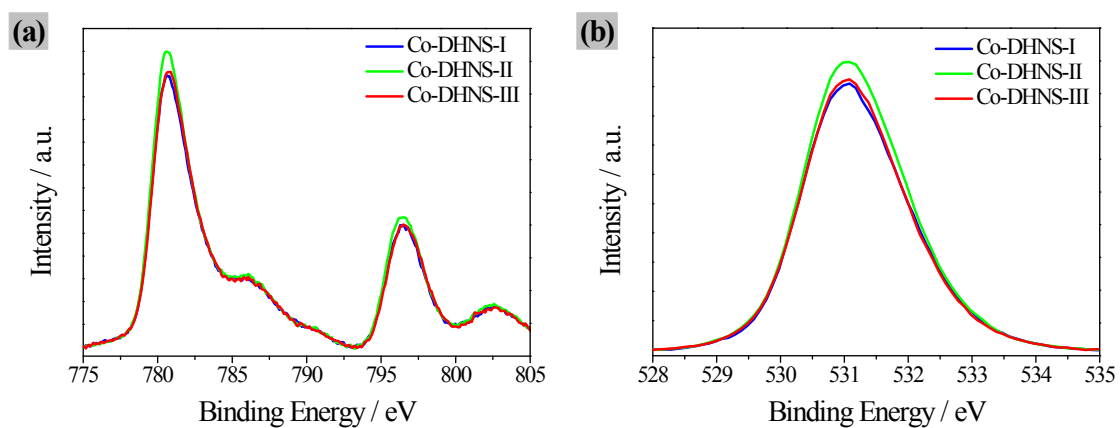

**Fig. S15.** (a) Co 2p and (b) O 1s high-resolution XPS spectra.

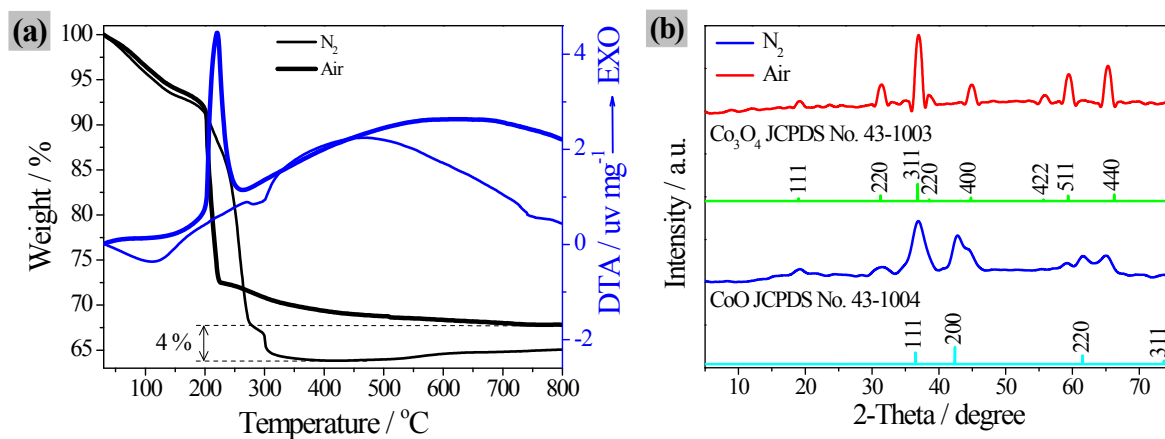

**Fig. S16.** (a) TG-DTA and DSC curves conducted in  $N_2$  and air atmosphere for Co-LDHNS-II and (b) the corresponding XRD patterns after TG measurements.

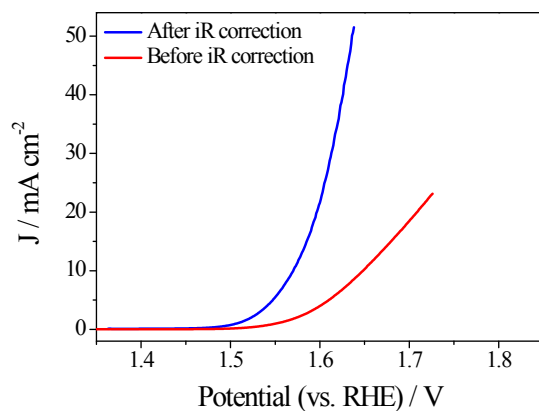

**Fig. S17.** LSV curves of Co-LDHNS-II before and after iR correction at 1600 rpm and  $2 \text{ mV s}^{-1}$  in 1 M KOH.

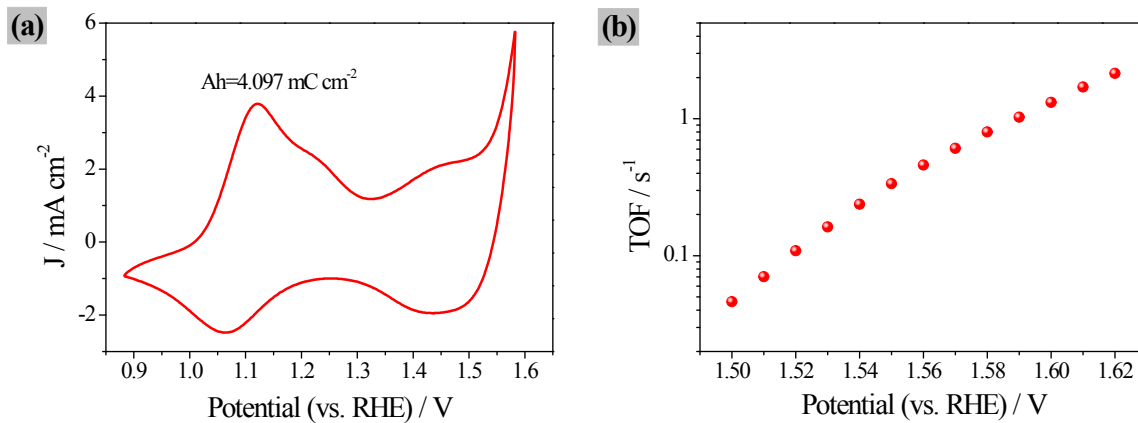

**Fig. S18.** (a) CV curve at  $50 \text{ mV s}^{-1}$  in 1 M KOH and (b) TOF for Co-LDHNS-II.

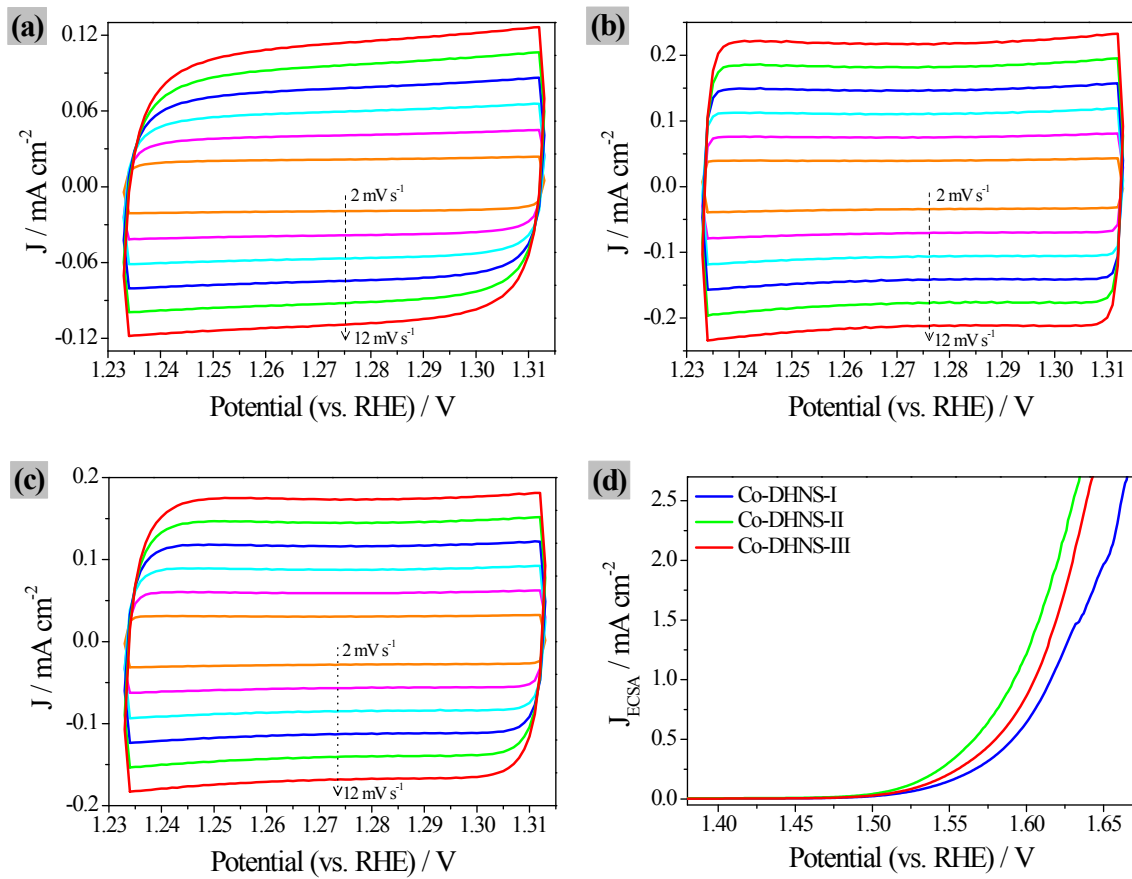

**Fig. S19.** CV curves in the double layer region at 2, 4, 6, 8, 10 and 12  $\text{mV s}^{-1}$  in 1 M KOH for (a) Co-LDHNS-I, (b) Co-LDHNS-II and (c) Co-LDHNS-III. (d) LSV curves normalized by electrochemical surface area (ECSA).

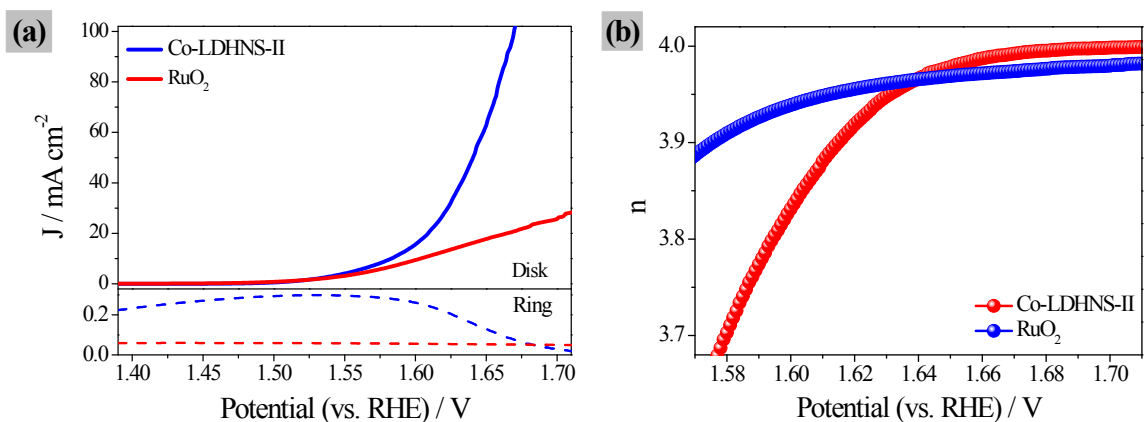

**Fig. S20.** (a) RRDE LSV curves of Co-LDHNS-II and RuO<sub>2</sub> in 1 M KOH. (b) Electron transfer number ( $n$ ) as a function of applied potentials obtained from (a).

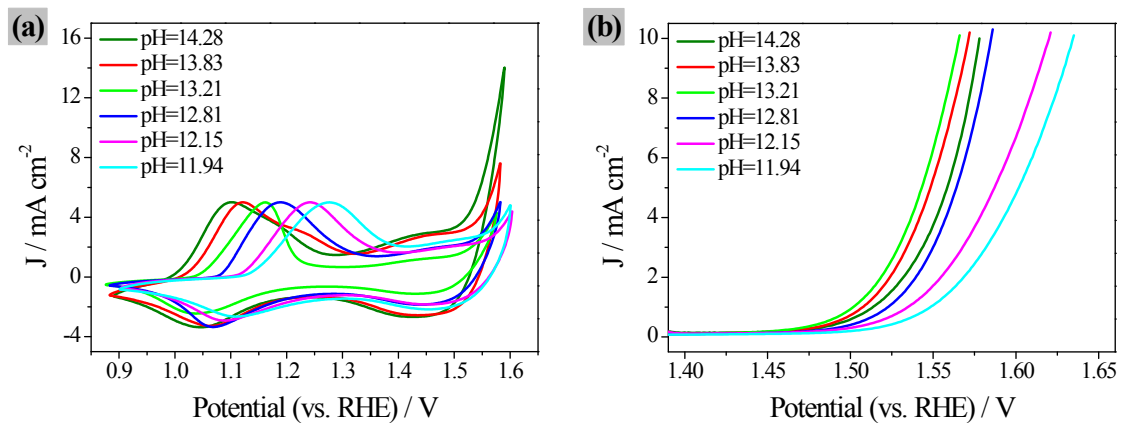

**Fig. S21.** (a) CV curves and (b) LSV curves of Co-LDHNS-II recorded in KOH aqueous solution with varied pH value.

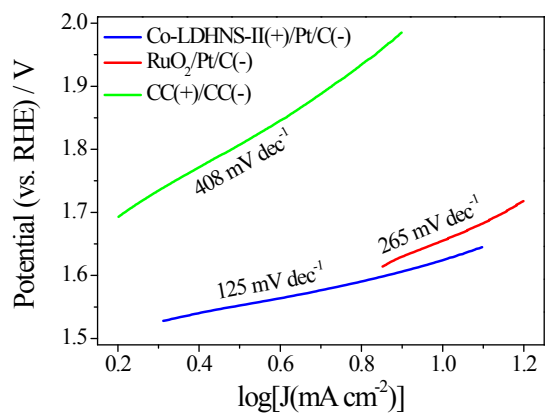

**Fig. S22.** Tafel plots obtained from LSV curves for overall water splitting.

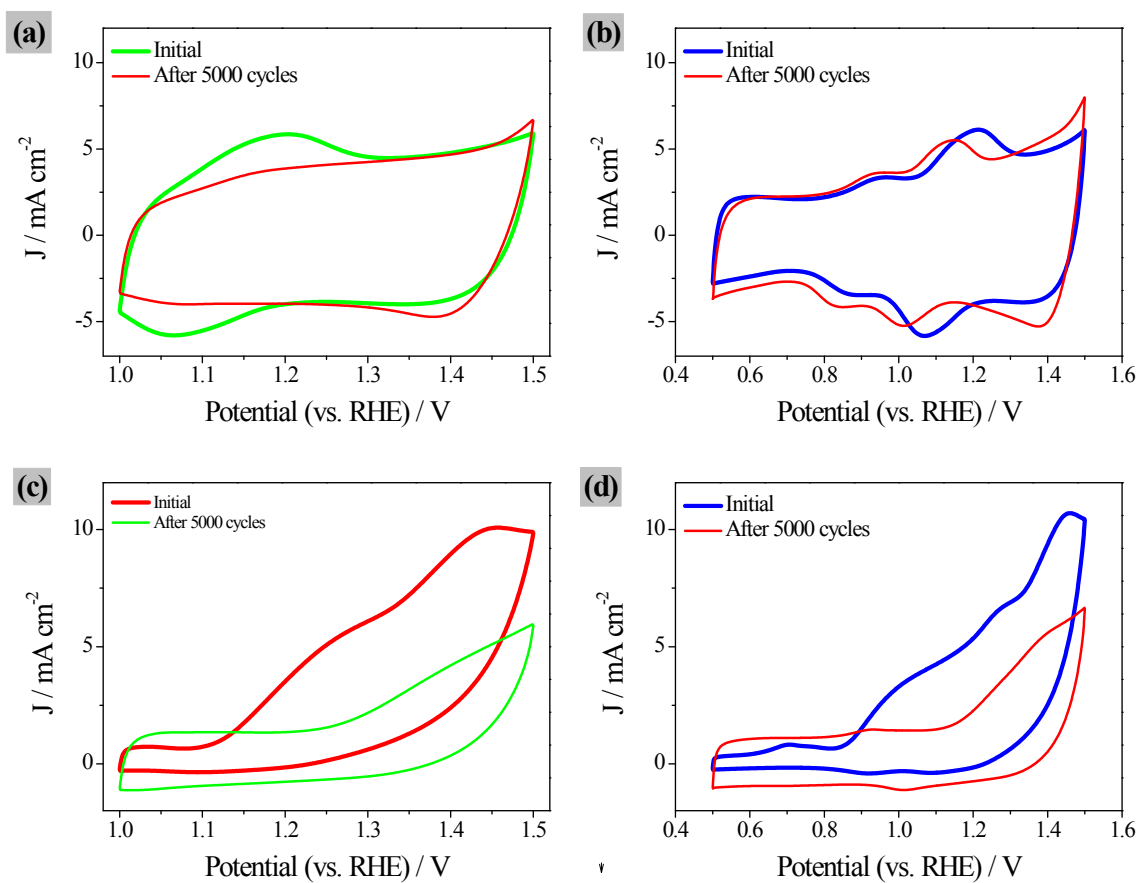

**Fig. S23.** CV curves before and after 5000 cycles: (a, b) Co-LDHNS-II(+)||Pt/C(-) and (c, d)

RuO<sub>2</sub>(+)||Pt/C(-).

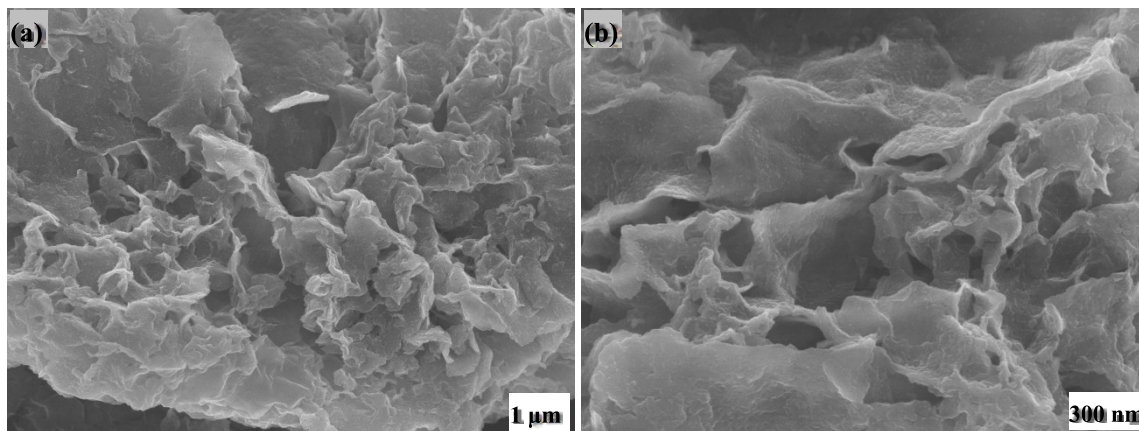

**Fig. S24.** SEM images for Co-LDHNS-II after 5000 cycles of Co-LDHNS-II(+)||Pt/C(-).

**Table S1.** Summary of recently reported electrocatalysts for OER.

| Electrocatalysts                                     | Substrate          | Mass loading<br>[mg cm <sup>-2</sup> ] | Electrolyte | $\eta$ @10 mA cm <sup>-2</sup><br>[mV] | Tafel slope<br>[mV dec <sup>-1</sup> ] | TOF<br>[s <sup>-1</sup> ] | Ref.      |
|------------------------------------------------------|--------------------|----------------------------------------|-------------|----------------------------------------|----------------------------------------|---------------------------|-----------|
| Co-LDHNS-II                                          | GCE                | 0.1                                    | 1 M KOH     | 340                                    | 56                                     | 0.801@ $\eta$ =350 mV     | This work |
|                                                      | GCE                | 0.1                                    | 0.1 M KOH   | 356                                    | 58                                     | 0.262@ $\eta$ =350 mV     |           |
| RuO <sub>2</sub>                                     | GCE                | 0.1                                    | 1 M KOH     | 364                                    | 78                                     | /                         |           |
| Co <sup>2+</sup> @SNG                                | GCE                | /                                      | 1 M KOH     | 370                                    | 62                                     | 0.266@ $\eta$ =350 mV     | S1        |
| CTs/Co-S                                             | CP <sup>c)</sup>   | 0.32                                   | 1 M KOH     | 306                                    | 72                                     | 0.016@ $\eta$ =300 mV     | S2        |
| CoCo LDH NS <sup>a)</sup>                            | NF                 | 1                                      | 1 M KOH     | 353                                    | 45                                     | 0.0035@ $\eta$ =300 mV    | S3        |
| NiCo LDH NS                                          | NF                 | 1                                      | 1 M KOH     | 332                                    | 40                                     | 0.01@ $\eta$ =300 mV      |           |
| NCNTFs                                               | GCE                | 0.2                                    | 1 M KOH     | 370                                    | 93                                     | /                         | S4        |
| 20 wt. % Pt/C                                        | GCE                | 0.2                                    | 1 M KOH     | 550                                    | 118                                    | /                         |           |
| Co-Bi NS/G                                           | GCE                | 0.285                                  | 1 M KOH     | 290                                    | 53                                     | /                         | S5        |
| RuO <sub>2</sub>                                     | GCE                | 0.285                                  | 1 M KOH     | 305                                    | 60                                     | /                         |           |
| NiCo LDH NB <sup>b)</sup>                            | GCE                | 0.25                                   | 1 M KOH     | 420                                    | 135                                    | /                         | S6        |
| CoFe LDH-Ar                                          | GCE                | 0.204                                  | 1 M KOH     | 266                                    | 38                                     | 4.78@ $\eta$ =300 mV      | S7        |
| CoFe LDH-F                                           | GCE                | 0.2                                    | 1 M KOH     | 300                                    | 40                                     | /                         | S8        |
|                                                      | NF                 | 1                                      | 1 M KOH     | 260                                    | 47                                     | /                         |           |
| CoAl-NS                                              | 3DGN <sup>d)</sup> | 0.05±0.01                              | 1 M KOH     | 252                                    | 36                                     | 1.14@ $\eta$ =350 mV      | S9        |
| IrO <sub>2</sub>                                     | 3DGN               | 0.05±0.01                              | 1 M KOH     | 277                                    | 45                                     | 0.73@ $\eta$ =350 mV      |           |
| CoMn LDH                                             | GCE                | 0.142                                  | 1 M KOH     | 324                                    | 43                                     | 0.13@ $\eta$ =350 mV      | S10       |
| IrO <sub>2</sub>                                     | GCE                | 0.142                                  | 1 M KOH     | 337                                    | 49                                     | 0.007@ $\eta$ =300 mV     |           |
| CoFe LDH NS                                          | CP                 | 0.17                                   | 1 M KOH     | 367                                    | 40                                     | /                         | S11       |
| $\gamma$ -CoOOH NS                                   | GCE                | 0.15                                   | 1 M KOH     | 300                                    | 38                                     | /                         | S12       |
| CoAl-LDH array                                       | NF                 | /                                      | 1 M KOH     | 335                                    | 128                                    | /                         | S13       |
| C-Co/Co <sub>3</sub> O <sub>4</sub> HS <sup>e)</sup> | GCE                | 0.408                                  | 1 M KOH     | 352                                    | 80                                     | /                         | S14       |
| RuO <sub>2</sub>                                     | GCE                | 0.408                                  | 1 M KOH     | 364                                    | 120                                    | /                         |           |

a)Nanosheets; b)Nanoboxes; c)Carbon paper; d)3D graphene network; e)hollow spheres



**Table S2.** Comparison of the water splitting activity of the Co-LDHNS-II with recently reported electrocatalysts in basic solutions.

| Electrocatalysts                                                                  | Substrate | Mass loading<br>[mg cm <sup>-2</sup> ] | Electrolyte | E@10 mA cm <sup>-2</sup><br>[mV] | Tafel slope<br>[mV dec <sup>-1</sup> ] | Ref.      |
|-----------------------------------------------------------------------------------|-----------|----------------------------------------|-------------|----------------------------------|----------------------------------------|-----------|
| Co-LDHNS-II(+)  Pt/C(-)                                                           | CC        | 1                                      | 1 M KOH     | 1.625                            | 125                                    | This work |
| RuO <sub>2</sub> (+)  Pt/C(-)                                                     | CC        | 1                                      | 1 M KOH     | 1.656                            | 265                                    |           |
| CTs/Co-S(+)  CTs/Co-S(-)                                                          | CP        | 0.32                                   | 1 M KOH     | 1.743                            | /                                      | S2        |
| RuO <sub>2</sub> (+)  Pt/C(-)                                                     | CP        | 0.32                                   | 1 M KOH     | 1.679                            | /                                      |           |
| CoFe LDH-F(+)  CoFe LDH-F(-)                                                      | NF        | 1                                      | 1 M KOH     | 1.63                             | 126                                    | S8        |
| IrO <sub>2</sub> (+)  Pt/C(-)                                                     | NF        | 1                                      | 1 M KOH     | 1.63                             | 241                                    |           |
| Pt/C(+)  Pt/C(-)                                                                  | NF        | 1                                      | 1 M KOH     | 1.7                              | 206                                    |           |
| VOOH(+)  VOOH(-)                                                                  | NF        | 0.8                                    | 1 M KOH     | 1.62                             | /                                      | S15       |
| RuO <sub>2</sub> (+)  Pt/C(-)                                                     | NF        | 0.8                                    | 1 M KOH     | 1.55                             | /                                      |           |
| NiFe-MOF(+)  NiFe-MOF(-)                                                          | NF        | 0.3                                    | 0.1 M KOH   | 1.55                             | 256                                    | S16       |
| IrO <sub>2</sub> (+)  Pt/C(-)                                                     | NF        | /                                      | 0.1 M KOH   | 1.62                             | 267                                    |           |
| CuCoO-NWs(+)  CuCoO-NWs(-)                                                        | NF        | 1.2                                    | 1 M KOH     | 1.61                             | /                                      | S17       |
| Na <sub>0.08</sub> Ni <sub>0.9</sub> Fe <sub>0.1</sub> O <sub>2</sub> (+)  NiP(-) | NF        | 0.13                                   | 1 M KOH     | 1.54                             | /                                      | S18       |
| RuO <sub>2</sub> (+)  Pt/C(-)                                                     | NF        | 0.13                                   | 1 M KOH     | 1.62                             | /                                      |           |

## References

- S1 *J. Am. Chem. Soc.*, 2017, **139**, 1878-1884.
- S2 *ACS Nano*, 2016, **10**, 2342-2348.
- S3 *Nat. Commun.*, 2014, **5**, 4477.
- S4 *Nat. Energy*, 2016, **1**, 15006.
- S5 *Angew. Chem. Int. Ed.*, 2016, **55**, 2488-2492.
- S6 *Angew. Chem.*, 2017, **129**, 3955-3958.
- S7 *Angew. Chem.*, 2017, **129**, 5961-5965.
- S8 *ACS Appl. Mater. Interfaces*, 2016, **8**, 34474-34481.
- S9 *Adv. Mater.*, 2016, **28**, 7640-7645.
- S10 *J. Am. Chem. Soc.*, 2014, **136**, 16481-16484.
- S11 *Nano Lett.*, 2015, **15**, 1421-1427.
- S12 *Angew. Chem. Int. Ed.*, 2015, **54**, 8722-8727.
- S13 *Nano Energy*, 2017, **37**, 98-107.
- S14 *J. Mater. Chem. A*, 2017, **5**, 11163-11170.
- S15 *Angew. Chem.*, 2017, **129**, 588-592.
- S16 *Nat. Commun.*, 2017, **8**, 15341.
- S17 *Adv. Funct. Mater.*, 2016, **26**, 8555-8561.
- S18 *Energy Environ. Sci.*, 2017, **10**, 121-128.
